# Supplementary material for: Occurrence, Ecological and Human Health Risks, and Seasonal Variations of Phenolic Compounds in Surface Water and Sediment of a Potential Polluted River Basin in China
Source: MDPI journal article supplement (doi:10.3390/ijerph14101140), 2017-09-27
Supplement: s1 [file s1]

# Occurrence, Ecological and Human Health Risks, and Seasonal Variations of Phenolic Compounds in Surface Water and Sediment of a Potential Polluted River Basin in China

Mo Zhou <sup>1,2</sup>, Jiquan Zhang <sup>1,2,\*</sup> and Caiyun Sun <sup>1,3</sup>

<sup>1</sup> Institute of Natural Disaster Research, Department of Environment, Northeast Normal University, NO. 2555 Jingyue Street, Changchun 130117, China; zhoulm037@nenu.edu.cn (M.Z.); xlsdydnl@126.com (C.S.)

<sup>2</sup> Key Laboratory for Vegetation Ecology, Ministry of Education, NO. 2555 Jingyue Street, Changchun 130117, China

<sup>3</sup> School of Resources and Environmental Engineering, Jilin Institute of Chemical Technology, NO. 45 Chengde Street, Jilin 132022, China

\* Correspondence: zhangjq022@nenu.edu.cn; Tel.: +86-135-9608-6467

**Table S1.** The selected physicochemical properties of phenolic compounds.

| Chemical Name         | Chemical Formula                                             | Molecular Weight | Solubility (mg/L) | logKow |
|-----------------------|--------------------------------------------------------------|------------------|-------------------|--------|
| phenol                | C <sub>6</sub> H <sub>5</sub> OH                             | 94.11            | 26160             | 1.51   |
| 2-Nitrophenol         | C <sub>6</sub> H <sub>5</sub> N <sub>1</sub> O <sub>3</sub>  | 139.11           | 2500              | 1.91   |
| 2,4-Dichlorophenol    | C <sub>6</sub> H <sub>4</sub> Cl <sub>2</sub> O <sub>1</sub> | 163              | 614.2             | 1.06   |
| 2,4,6-Trichlorophenol | C <sub>6</sub> H <sub>3</sub> Cl <sub>3</sub> O <sub>1</sub> | 197.45           | 121               | 3.45   |
| Pentachlorophenol     | C <sub>6</sub> H <sub>1</sub> Cl <sub>5</sub> O <sub>1</sub> | 266.34           | 3.09              | 4.74   |

**Table S2.** The selected properties of sediment and water samples.

| Water         | Temperature (°C) | pH                 | DO (mg/L) | NH <sub>3</sub> -N (mg/L) | COD (mg/L) |
|---------------|------------------|--------------------|-----------|---------------------------|------------|
| Normal season | 13               | 6.5                | 6.25      | 0.49                      | 27.75      |
| Wet season    | 25               | 6.5                | 8.1       | 0.56                      | 38.85      |
| Dry season    | 5                | 6.5                | 4.15      | 0.49                      | 62.16      |
| Sediment      | pH               | Organic matter (%) |           |                           |            |
| Normal season | 7.5              | 3.26               |           |                           |            |
| Wet season    | 7.02             | 2.84               |           |                           |            |
| Dry season    | 7.23             | 2.41               |           |                           |            |

**Table S3.** The selected parameters of five phenolic compounds for risk assessment.

|           | PNEC <sub>water</sub> (ng·L <sup>-1</sup> ) | RfD (mg·kg <sup>-1</sup> ·d <sup>-1</sup> ) | CSF (kg·d·mg <sup>-1</sup> ) | K <sub>oc</sub> (L·kg <sup>-1</sup> ) | PNEC <sub>sed</sub> (ng·g <sup>-1</sup> ) |
|-----------|---------------------------------------------|---------------------------------------------|------------------------------|---------------------------------------|-------------------------------------------|
| Phenol    | 3600                                        | 3.00 × 10 <sup>-1</sup>                     | NR                           | 187.2                                 | 80.352                                    |
| 4-NP      | 2800                                        | NR                                          | NR                           | 296.7                                 | 93.156                                    |
| 2,4-DCP   | 790                                         | 3.00 × 10 <sup>-3</sup>                     | NR                           | 491.8                                 | 41.6962                                   |
| 2,4,6-TCP | 340                                         | NR                                          | 1.10 × 10 <sup>-2</sup>      | 1777                                  | 61.642                                    |
| PCP       | 58                                          | 5.00 × 10 <sup>-2</sup>                     | 4.00 × 10 <sup>-2</sup>      | 4959                                  | 28.971                                    |

NR meant there were no reports about the parameters.

**Table S4.** The values of hazard quotient of five phenolic compounds in Yinma River Basin.

| HQ        | Normal Season         | Wet Season            | Dry Season            |
|-----------|-----------------------|-----------------------|-----------------------|
| Phenol    | $1.16 \times 10^{-5}$ | $1.35 \times 10^{-5}$ | $9.59 \times 10^{-6}$ |
| 2-NP      | --                    | --                    | --                    |
| 2,4-DCP   | $5.38 \times 10^{-4}$ | $6.25 \times 10^{-4}$ | $4.84 \times 10^{-4}$ |
| 2,4,6-TCP | --                    | --                    | --                    |
| PCP       | $3.22 \times 10^{-5}$ | $4.31 \times 10^{-5}$ | $2.30 \times 10^{-5}$ |
| total     | $5.81 \times 10^{-4}$ | $6.82 \times 10^{-4}$ | $5.17 \times 10^{-4}$ |

**Table S5.** The values of incremental lifetime cancer (ILCR) of five phenolic compounds in Yinma River Basin.

| ILCR      | Normal Season         | Wet Season            | Dry Season            |
|-----------|-----------------------|-----------------------|-----------------------|
| Phenol    | --                    | --                    | --                    |
| 2-NP      | --                    | --                    | --                    |
| 2,4-DCP   | --                    | --                    | --                    |
| 2,4,6-TCP | $9.7 \times 10^{-9}$  | $1.15 \times 10^{-8}$ | $7.08 \times 10^{-9}$ |
| PCP       | $6.43 \times 10^{-8}$ | $8.63 \times 10^{-8}$ | $4.61 \times 10^{-8}$ |
| total     | $7.40 \times 10^{-8}$ | $9.78 \times 10^{-8}$ | $5.31 \times 10^{-8}$ |
